# Supplementary material
Source: MDPI journal article supplement (https://www.mdpi.com/2073-4395/12/1/147)
Supplement: s1 [file s1]

**Table S1.** Significance of sources of variation in one-way ANOVA for a mean number of adults thrips during onion plants colonization, the seasonal mean number of thrips (adults +larvae) throughout the all growing season from tested onion cultivars, and seasonal mean percentage of damaged leaf area caused by feeding thrips in 2015 and 2016, df = 7.

| Indicators                                                     | Year | Significance |            |         |         |
|----------------------------------------------------------------|------|--------------|------------|---------|---------|
|                                                                |      | F cultivar   | p cultivar | F block | p block |
| Mean number of migrating adults thrips per 10 plants           | 2015 | 6.618        | <0.001     | 4.789   | 0.011   |
|                                                                | 2016 | 8.022        | <0.001     | 3.261   | 0.042   |
| Seasonal mean number of thrips adults and larvae per 10 plants | 2015 | 12.58        | <0.001     | 70.72   | <0.001  |
|                                                                | 2016 | 16.976       | <0.001     | 2.210   | 0.117   |
| Seasonal mean number of thrips larvae per 10 plants            | 2015 | 5.592        | <0.001     | 0.864   | 0.475   |
|                                                                | 2016 | 5.729        | <0.001     | 2.131   | 0.127   |
| Mean percentage of damaged leaf area caused by feeding thrips  | 2015 | 5.677        | <0.001     | 0.757   | 0.530   |
|                                                                | 2016 | 2.579        | 0.043      | 3.100   | 0.049   |

**Table S2.** Significance of sources of variation in one-way ANOVA for a mean number of thrips (adults + imago) collected from tested onion cultivars and mean percentage of damaged leaf area caused by feeding thrips in subsequent days of observation in 2015 and 2016, df = 7.

| Date      | Mean Number of Thrips (Adults + Larvae/10 Plants) |            |         |         | Mean Percentage of Damaged Leaf Area |            |           |         |
|-----------|---------------------------------------------------|------------|---------|---------|--------------------------------------|------------|-----------|---------|
|           | F cultivar                                        | p cultivar | F block | p block | F cultivar                           | p cultivar | F block r | P block |
| Year 2015 |                                                   |            |         |         |                                      |            |           |         |
| 24.06.    | 3.880                                             | 0.007      | 11.353  | 0.000   | 1.407                                | 0.254      | 2.313     | 0.105   |
| 02.07     | 5.958                                             | 0.000      | 3.209   | 0.043   | 3.239                                | 0.017      | 2.356     | 0.101   |
| 11.07     | 2.992                                             | 0.024      | 1.189   | 0.338   | 0.591                                | 0.756      | 3.646     | 0.029   |
| 17.07     | 2.669                                             | 0.038      | 5.329   | 0.007   | 3.438                                | 0.013      | 0.267     | 0.848   |
| 21.07     | 1.476                                             | 0.229      | 3.067   | 0.030   | 6.618                                | 0.000      | 1.849     | 0.169   |
| 28.07     | 5.157                                             | 0.001      | 7.817   | 0.001   | 1.262                                | 0.316      | 1.566     | 0.227   |
| 04.08     | 3.950                                             | 0.007      | 4.697   | 0.011   | 1.056                                | 0.424      | 0.692     | 0.567   |
| 11.08     | 1.800                                             | 0.140      | 4.236   | 0.017   | 1.734                                | 0.155      | 1.522     | 0.238   |
| 19.08     | 2.141                                             | 0.084      | 3.219   | 0.043   | 4.392                                | 0.004      | 3.415     | 0.036   |
| 24.08     | 6.834                                             | 0.000      | 10.842  | 0.000   | -                                    | -          | -         | -       |
| Year 2016 |                                                   |            |         |         |                                      |            |           |         |
| 16.06     | 1.416                                             | 0.251      | 0.974   | 0.423   | 0.782                                | 0.609      | 3.238     | 0.043   |
| 25.06     | 23.996                                            | 0.000      | 3.342   | 0.039   | 1.057                                | 0.423      | 1.599     | 0.219   |
| 30.06     | 3.584                                             | 0.011      | 1.610   | 0.217   | 1.030                                | 0.439      | 3.083     | 0.049   |
| 07.07     | 6.586                                             | 0.000      | 2.209   | 0.117   | 24.254                               | 0.000      | 1.873     | 0.165   |
| 13.07     | 4.390                                             | 0.004      | 1.086   | 0.377   | 1.247                                | 0.323      | 1.254     | 0.315   |
| 20.07     | 5.043                                             | 0.002      | 0.263   | 0.851   | 0.776                                | 0.614      | 0.188     | 0.903   |
| 27.07     | 1.011                                             | 0.452      | 0.985   | 0.419   | 1.188                                | 0.351      | 0.740     | 0.539   |
| 04.08     | 2.633                                             | 0.040      | 1.207   | 0.361   | 0.159                                | 0.991      | 0.466     | 0.709   |
| 08.08     | 2.600                                             | 0.042      | 1.558   | 0.229   | 5.393                                | 0.001      | 3.469     | 0.003   |
| 16.08     | 3.097                                             | 0.021      | 0.707   | 0.559   | 2.983                                | 0.024      | 2.326     | 0.104   |

**Table S3.** Pearson's correlation between anatomical characteristics of onion leaves and the number of *Thrips tabaci* and percentage of damaged leaf area of onion leaves in 2016 (n =8).

| Parameters                                           | No. of Thrips (Imago + Larvae)  |       |                             |       | Damaged Leaf Area                                 |       |                                               |       |
|------------------------------------------------------|---------------------------------|-------|-----------------------------|-------|---------------------------------------------------|-------|-----------------------------------------------|-------|
|                                                      | Mean No. of Thrips on 08 August |       | Seasonal Mean No. of Thrips |       | Mean Percentage of Damaged Leaf Area on 08 August |       | Seasonal Mean Percentage of Damaged Leaf Area |       |
|                                                      | r                               | p     | r                           | p     | r                                                 | p     | r                                             | p     |
| Mean leaf blade thickness [ $\mu\text{m}$ ]          | -0.598                          | 0.118 | -0.638                      | 0.881 | 0.326                                             | 0.429 | 0.032                                         | 0.940 |
| Epidermis thickness [ $\mu\text{m}$ ]                | -0.356                          | 0.387 | 0.121                       | 0.744 | 0.635                                             | 0.090 | 0.668                                         | 0.070 |
| Epidermal cells perimeter [ $\mu\text{m}$ ]          | 0.123                           | 0.770 | -0.368                      | 0.369 | 0.398                                             | 0.331 | 0.672                                         | 0.068 |
| Epidermal cells area [ $\mu\text{m}$ ]               | 0.118                           | 0.781 | -0.361                      | 0.379 | 0.361                                             | 0.379 | 0.653                                         | 0.079 |
| Mesophyll cells perimeter [ $\mu\text{m}$ ]          | -0.569                          | 0.141 | -0.699                      | 0.054 | 0.641                                             | 0.086 | 0.538                                         | 0.168 |
| Mesophyll cells area [ $\mu\text{m}$ ]               | -0.576                          | 0.134 | <b>-0.734</b>               | 0.038 | <b>0.738</b>                                      | 0.036 | 0.674                                         | 0.067 |
| Mean diameter of vascular bundles [ $\mu\text{m}$ ]  | -0.631                          | 0.093 | -0.290                      | 0.485 | 0.422                                             | 0.297 | 0.186                                         | 0.659 |
| Mean perimeter of vascular bundles [ $\mu\text{m}$ ] | <b>-0.710</b>                   | 0.048 | -0.301                      | 0.469 | 0.325                                             | 0.431 | 0.157                                         | 0.710 |
| Mean area of vascular bundles [ $\mu\text{m}$ ]      | -0.685                          | 0.061 | -0.349                      | 0.396 | 0.421                                             | 0.299 | 0.186                                         | 0.659 |
| Mean distance between VB [ $\mu\text{m}$ ]           | -0.542                          | 0.165 | -0.080                      | 0.850 | -0.126                                            | 0.766 | -0.421                                        | 0.299 |

Note: bold r coefficient values designate significant correlation at  $p < 0.05$ ; ns—not significant at  $p < 0.05$ .

**Table S4.** The contents of sugars and total phenols in damaged by *Thrips tabaci* leaves of the tested onion cultivars in 2015, df = 7.

| Cultivar               | Mean Quantity ( $\pm$ SE) [mg /100 g FW <sup>1</sup> ] |                     |                    |                     |
|------------------------|--------------------------------------------------------|---------------------|--------------------|---------------------|
|                        | Soluble Sugars                                         | Reducing Sugars     | Sucrose            | Total Phenols       |
| Alibaba                | 0.96 $\pm$ 0.005 b <sup>2</sup>                        | 0.123 $\pm$ 0.003 a | 0.84 $\pm$ 0.003 b | 112.25 $\pm$ 3.02 a |
| Bila                   | 0.85 $\pm$ 0.005 e                                     | 0.089 $\pm$ 0.002 d | 0.76 $\pm$ 0.003 e | 82.13 $\pm$ 0.28 cd |
| Karmen                 | 0.85 $\pm$ 0.003 e                                     | 0.084 $\pm$ 0.003 e | 0.77 $\pm$ 0.002 e | 85.84 $\pm$ 0.67 bc |
| Kristine               | 0.82 $\pm$ 0.001 f                                     | 0.080 $\pm$ 0.000 f | 0.74 $\pm$ 0.001 f | 74.37 $\pm$ 1.33 e  |
| Niagara F <sub>1</sub> | 0.93 $\pm$ 0.001 c                                     | 0.108 $\pm$ 0.002 b | 0.83 $\pm$ 0.001 c | 89.13 $\pm$ 0.72 b  |
| Polanowska             | 0.72 $\pm$ 0.005 g                                     | 0.093 $\pm$ 0.001 c | 0.62 $\pm$ 0.004 g | 78.47 $\pm$ 0.49de  |
| Tęcza                  | 0.89 $\pm$ 0.009 d                                     | 0.094 $\pm$ 0.001 c | 0.80 $\pm$ 0.008 d | 75.82 $\pm$ 0.34 e  |
| Wenta                  | 1.02 $\pm$ 0.006 a                                     | 0.123 $\pm$ 0.002 a | 0.89 $\pm$ 0.005 a | 109.85 $\pm$ 0.91 a |
| F cultivar             | 1088.3                                                 | 184.44              | 638.9              | 120.230             |
| p cultivar             | 0.000                                                  | 0.000               | 0.000              | 0.000               |
| F blocks               | 17.6                                                   | 17.74               | 4.5                | 0.24                |
| p blocks               | 0.000                                                  | 0.000               | 0.014              | 0.870               |

Note: <sup>1</sup>FW = Fresh weight; <sup>2</sup>means within a column followed by the same letter(s) are not significantly different (Duncan's Multiple Range Test P<0.05).

**Table S5.** The contents of sugars and total phenols in damaged by *Thrips tabaci* leaves of the tested onion cultivars in 2016, df = 7.

| Cultivar               | Mean Quantity ( $\pm$ SE) [mg /100 g FW <sup>1</sup> ] |                    |                    |                    |
|------------------------|--------------------------------------------------------|--------------------|--------------------|--------------------|
|                        | Soluble sugars                                         | Reducing sugars    | Sucrose            | Total phenols      |
| Alibaba                | 1.01 $\pm$ 0.002 b <sup>2</sup>                        | 0.12 $\pm$ 0.003 a | 0.89 $\pm$ 0.001 b | 75.87 $\pm$ 0.35 c |
| Bila                   | 0.82 $\pm$ 0.006 e                                     | 0.09 $\pm$ 0.002 d | 0.73 $\pm$ 0.004 e | 62.06 $\pm$ 0.22 f |
| Karmen                 | 0.97 $\pm$ 0.023 c                                     | 0.08 $\pm$ 0.002 e | 0.89 $\pm$ 0.021 b | 65.00 $\pm$ 0.66 e |
| Kristine               | 0.74 $\pm$ 0.034 f                                     | 0.06 $\pm$ 0.002 g | 0.67 $\pm$ 0.032 f | 48.82 $\pm$ 0.10 e |
| Niagara F <sub>1</sub> | 0.82 $\pm$ 0.009 e                                     | 0.11 $\pm$ 0.003 b | 0.72 $\pm$ 0.006 e | 67.66 $\pm$ 0.80 d |
| Polanowska             | 1.16 $\pm$ 0.011 a                                     | 0.10 $\pm$ 0.004 c | 1.06 $\pm$ 0.008 a | 55.90 $\pm$ 0.15 g |
| Tęcza                  | 0.87 $\pm$ 0.007 d                                     | 0.07 $\pm$ 0.001 f | 0.80 $\pm$ 0.006 c | 90.21 $\pm$ 0.78 a |
| Wenta                  | 0.85 $\pm$ 0.006 de                                    | 0.08 $\pm$ 0.003 e | 0.76 $\pm$ 0.003 d | 85.81 $\pm$ 0.36 b |
| F cultivar             | 147.98                                                 | 383.22             | 124.50             | 741.8              |
| p cultivar             | 0.000                                                  | 0.000              | 0.000              | 0.000              |
| F blocks               | 8.79                                                   | 54.60              | 5.67               | 0.3                |
| p blocks               | 0.000                                                  | 0.000              | 0.005              | 0.810              |

Note: <sup>1</sup>FW = Fresh weight; <sup>2</sup>means within a column followed by the same letter(s) are not significantly different (Duncan's Multiple Range Test P<0.05).

**Table S6.** The contents of chlorophyll a and b and the sum of carotenoids in not damaged and damaged by *Thrips tabaci* leaves of the tested onion cultivars in 2015, df = 7.

| Cultivar               | Mean Quantity ( $\pm$ SE) [mg /100 g FW <sup>1</sup> ] |                     |                     |                         |                      |                     |
|------------------------|--------------------------------------------------------|---------------------|---------------------|-------------------------|----------------------|---------------------|
|                        | In not damaged onion leaves                            |                     |                     | In damaged onion leaves |                      |                     |
|                        | Chlorophyll a                                          | Chlorophyll b       | Sum of Carotenoids  | Chlorophyll a           | Chlorophyll b        | Sum of Carotenoids  |
| Alibaba                | 565.76 $\pm$ 9.96 a <sup>2</sup>                       | 251.37 $\pm$ 3.00 a | 113.55 $\pm$ 1.02 b | 525.35 $\pm$ 16.38 a    | 240.29 $\pm$ 5.12 a  | 112.34 $\pm$ 2.59 b |
| Bila                   | 472.22 $\pm$ 2.53 b                                    | 210.08 $\pm$ 1.15 e | 101.30 $\pm$ 0.47 d | 429.18 $\pm$ 3.44 c     | 200.76 $\pm$ 6.49 bc | 97.59 $\pm$ 1.31 b  |
| Karmen                 | 478.17 $\pm$ 2.36 b                                    | 208.25 $\pm$ 0.84 e | 107.83 $\pm$ 0.84 c | 446.14 $\pm$ 5.45 bc    | 197.34 $\pm$ 8.79 c  | 99.55 $\pm$ 3.85 c  |
| Kristine               | 372.87 $\pm$ 1.48 d                                    | 159.18 $\pm$ 0.43 g | 83.10 $\pm$ 0.34 f  | 342.20 $\pm$ 10.29 e    | 140.25 $\pm$ 3.90 e  | 79.19 $\pm$ 3.85 d  |
| Niagara F <sub>1</sub> | 562.75 $\pm$ 1.76 a                                    | 247.33 $\pm$ 0.70 b | 127.20 $\pm$ 0.29 a | 542.99 $\pm$ 10.03 a    | 219.55 $\pm$ 6.35 b  | 125.35 $\pm$ 4.17 a |
| Polanowska             | 420.38 $\pm$ 5.25 c                                    | 187.23 $\pm$ 3.17 f | 90.21 $\pm$ 0.95 e  | 391.04 $\pm$ 5.73 d     | 177.15 $\pm$ 4.13 d  | 84.72 $\pm$ 3.38 d  |
| Tęcza                  | 472.97 $\pm$ 2.72 b                                    | 218.39 $\pm$ 1.79 d | 112.78 $\pm$ 0.78 b | 450.04 $\pm$ 7.64 b     | 201.66 $\pm$ 8.55 bc | 109.19 $\pm$ 2.35 b |
| Wenta                  | 470.1 $\pm$ 7.78 b                                     | 227.49 $\pm$ 1.79 c | 102.98 $\pm$ 0.39 d | 444.60 $\pm$ 16.29 bc   | 211.20 $\pm$ 3.81 bc | 96.95 $\pm$ 2.36 c  |
| F cultivar             | 354.4                                                  | 514.0               | 529.0               | 119.35                  | 22.678               | 24.08               |
| p cultivar             | 0.000                                                  | 0.000               | 0.000               | 0.000                   | 0.000                | 0.000               |
| F blocks               | 10.09                                                  | 8.6                 | 3.5                 | 17.35                   | 0.805                | 0.862               |
| p blocks               | 0.000                                                  | 0.000               | 0.033               | 0.000                   | 0.505                | 0.476               |

Note: <sup>1</sup>FW = Fresh weight; <sup>2</sup>means within a column followed by the same letter(s) are not significantly different (Duncan's Multiple Range Test P<0.05).

**Table S7.** The contents of chlorophyll a and b and the sum of carotenoids in not damaged and damaged by *Thrips tabaci* leaves of the tested onion cultivars in 2016, df = 7.

| Cultivar               | Mean Quantity ( $\pm$ SE) [mg /100 g FW <sup>1</sup> ] |                     |                     |                         |                      |                      |
|------------------------|--------------------------------------------------------|---------------------|---------------------|-------------------------|----------------------|----------------------|
|                        | In not damaged onion leaves                            |                     |                     | In damaged onion leaves |                      |                      |
|                        | Chlorophyll a                                          | Chlorophyll b       | Sum of Carotenoids  | Chlorophyll a           | Chlorophyll b        | Sum of Carotenoids   |
| Alibaba                | 601.69 $\pm$ 8.19 b <sup>2</sup>                       | 242.35 $\pm$ 2.70 d | 161.75 $\pm$ 1.76 c | 487.81 $\pm$ 8.37 c     | 218.92 $\pm$ 3.39 bc | 118.33 $\pm$ 1.77 c  |
| Bila                   | 484.55 $\pm$ 8.39 e                                    | 91.24 $\pm$ 3.171 f | 133.49 $\pm$ 2.52 f | 390.62 $\pm$ 5.11 e     | 180.64 $\pm$ 1.54 e  | 100.48 $\pm$ 1.57 d  |
| Karmen                 | 508.77 $\pm$ 1.01 d                                    | 207.66 $\pm$ 0.99 e | 140.96 $\pm$ 1.17 e | 427.68 $\pm$ 2.03 d     | 195.39 $\pm$ 3.13 d  | 115.05 $\pm$ 1.02 c  |
| Kristine               | 406.79 $\pm$ 1.88 g                                    | 172.52 $\pm$ 3.02 h | 106.61 $\pm$ 1.13 h | 336.21 $\pm$ 17.41f     | 143.64 $\pm$ 7.48 f  | 86.12 $\pm$ 4.06 e   |
| Niagara F <sub>1</sub> | 571.56 $\pm$ 2.62 c                                    | 251.89 $\pm$ 1.13 c | 150.59 $\pm$ 0.50 d | 545.84 $\pm$ 4.30 a     | 225.64 $\pm$ 1.61 ab | 137.44 $\pm$ 1.25 ab |
| Polanowska             | 440.75 $\pm$ 1.54 f                                    | 180.93 $\pm$ 1.21 g | 113.48 $\pm$ 2.36 g | 390.07 $\pm$ 9.97 e     | 186.39 $\pm$ 3.96 e  | 100.30 $\pm$ 2.99 d  |
| Tęcza                  | 639.88 $\pm$ 0.79 a                                    | 279.24 $\pm$ 0.85 a | 186.72 $\pm$ 1.39 a | 511.67 $\pm$ 8.27 b     | 210.03 $\pm$ 5.54 c  | 134.14 $\pm$ 2.84 b  |
| Wenta                  | 633.53 $\pm$ 5.49 a                                    | 274.37 $\pm$ 1.94 b | 169.76 $\pm$ 1.39 b | 456.51 $\pm$ 13.66 a    | 229.93 $\pm$ 5.69 a  | 142.69 $\pm$ 4.46 a  |
| F cultivar             | 755.3                                                  | 931.7               | 387.76              | 176.05                  | 80.51                | 8.48                 |
| p cultivar             | 0.000                                                  | 0.000               | 0.000               | 0.0000                  | 0.000                | 0.000                |
| F blocks               | 10.5                                                   | 11.0                | 3.73                | 14.68                   | 6.37                 | 103.47               |
| p blocks               | 0.000                                                  | 0.000               | 0.026               | 0.000                   | 0.003                | 0.000                |

Note: <sup>1</sup>FW = Fresh weight; <sup>2</sup>means within a column followed by the same letter(s) are not significantly different (Duncan's Multiple Range Test P<0.05).

**Table S8.** Significance of sources of variation in two-way ANOVA for biochemical parameters of leaves of tested onion cultivars in 2015 and 2016.

| Biochemical<br>Parameter                   | Year | Source of Variation |          |                  |          |       |          |        |          |
|--------------------------------------------|------|---------------------|----------|------------------|----------|-------|----------|--------|----------|
|                                            |      | Cultivars (A)       |          | Damage Level (B) |          | A × B |          | Blocks |          |
|                                            |      | F                   | <i>p</i> | F                | <i>p</i> | F     | <i>p</i> | F      | <i>p</i> |
| Soluble sugars<br>content [g/100 g<br>FW*] | 2015 | 892.0               | <0.001   | 3851.0           | <0.001   | 80.0  | <0.001   | 16.0   | <0.001   |
|                                            | 2016 | 274.9               | <0.001   | 1082.9           | <0.001   | 8.5   | <0.001   | 20.0   | <0.001   |
| Reducing sugars<br>content [g/100 g<br>FW] | 2015 | 93.3                | <0.001   | 100.4            | <0.001   | 24.9  | <0.001   | 23.0   | <0.001   |
|                                            | 2016 | 256.2               | <0.001   | 37.2             | <0.001   | 22.0  | <0.001   | 22.9   | <0.001   |
| Sucrose content<br>[g/100 g FW]            | 2015 | 707.0               | <0.001   | 4181.0           | <0.001   | 78.0  | <0.001   | 5.0    | 0.007    |
|                                            | 2016 | 249.0               | <0.001   | 1116.0           | <0.001   | 12.0  | <0.001   | 15.0   | <0.001   |
| Phenols content<br>[g/100 g FW]            | 2015 | 373.0               | <0.001   | 380.0            | <0.001   | 3.0   | 0.021    | 1.0    | 0.612    |
|                                            | 2016 | 662.0               | <0.001   | 249.0            | <0.001   | 17.0  | <0.001   | 0.0    | 0.707    |
| Chlorophyll a<br>content<br>[mg/100 g FW]  | 2015 | 294.2               | <0.001   | 130.7            | <0.001   | 1.2   | 0.311    | 22.8   | <0.001   |
|                                            | 2016 | 500.9               | <0.001   | 974              | <0.001   | 19.9  | <0.001   | 20.2   | <0.001   |
| Chlorophyll b<br>content<br>[mg/100 g FW]  | 2015 | 85.34               | <0.001   | 43.6             | <0.001   | 0.9   | 0.497    | 0.89   | 0.455    |
|                                            | 2016 | 370.3               | <0.001   | 431.9            | <0.001   | 40.9  | <0.001   | 11.9   | <0.001   |
| Content of<br>carotenoids<br>[mg/100 g FW] | 2015 | 89.7                | <0.001   | 15.8             | <0.001   | 0.6   | 0.774    | 1.6    | 0.198    |
|                                            | 2016 | 341.8               | <0.001   | 1046.6           | <0.001   | 31.2  | <0.001   | 11.4   | <0.001   |
| df                                         | —    | 7                   |          | 1                |          | 7     |          | 3      |          |
| Error df                                   | —    | 45                  |          |                  |          |       |          |        |          |

Note: \*FW=Fresh weight; significant at  $p<0.05$
